# Supplementary figures and images for: From Data to Diagnosis: How Machine Learning Is Changing Heart Health Monitoring
Source: MDPI journal article supplement (doi:10.3390/ijerph20054605), 2023-03-05

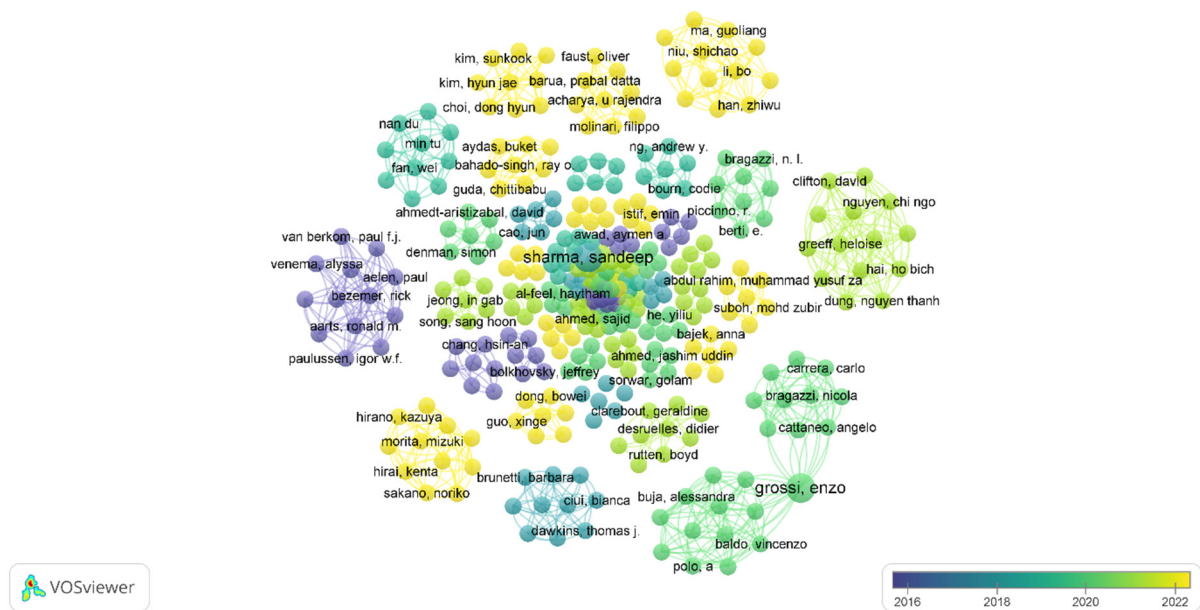

Cluster analysis of semantic web using VOSviewer software

Supplement: s1 [file s1]
